# Supplementary material for: A selectivity filter at the intracellular end of the acid-sensing ion channel pore
Source: eLife journal article supplement (doi:10.7554/elife.24630), 2017-05-12

**A**

|              | -8'   | 0'    | 4'   | 7'   | 10' | 12' | 15'  | 18'  | 21'  | UniProt ID |
|--------------|-------|-------|------|------|-----|-----|------|------|------|------------|
| Chick_ASIC1  | YEVA  | GLLG  | DIGG | QMGL | FI  | GAS | IL   | TVLE | LFD  | Q1XA76     |
| Mouse_ASIC1a | YEIAG | LLGD  | DIGG | QMGL | FI  | GAS | IL   | TVLE | LFD  | Q6NXX8     |
| Mouse_ASIC2a | YEVA  | ALLG  | DIGG | QMGL | FI  | GAS | IL   | TVLE | LFD  | Q925H0     |
| Mouse_ASIC3  | YEVSE | LLGD  | DIGG | QMGL | FI  | GAS | LL   | TVLE | IILD | Q6X1Y6     |
| Mouse_ENaCa  | VTMV  | SLLS  | NLGS | QWSL | WFG | S   | SVLS | VVEM | AE   | Q61180     |
| Mouse_ENaCb  | NNIV  | WLLS  | NLGG | QFG  | FWM | GGS | VL   | CLIE | FGE  | Q9WU38     |
| Mouse_ENaCg  | NSIE  | MLLS  | NFGG | QLGL | WM  | SCS | VVC  | VEIE | IE   | Q9WU39     |
| C. el_DEG-1  | YGLV  | NLIAD | FGG  | HLGL | WL  | GFS | VIT  | VM   | ECV  | P24585     |
| C. el_MEC-4  | YGFV  | NLLAD | FGG  | QLGL | WC  | GIS | FLT  | TC   | CE   | P24612     |
| Aplys_FaNaC  | YGLAD | LFAD  | DIGG | TLGL | WM  | GIS | VLT  | IM   | ELME | Q4H3X6     |
| Hydra_HyNaC2 | YDFY  | KLIG  | DVGG | QLGL | LL  | GAS | VLT  | LV   | EFVD | A8DZR6     |

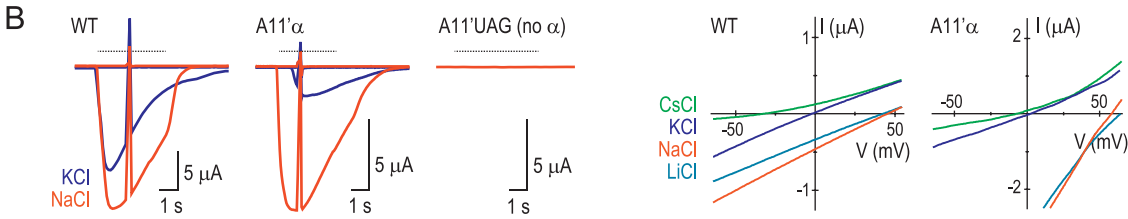

Supplement: supp [file elife_poa_e24630_Figure_1_Figure_Supplement_1.pdf › elife_poa_e24630_Figure_1_Figure_Supplement_1.pdf]
