# Supplementary material for: A selectivity filter at the intracellular end of the acid-sensing ion channel pore
Source: eLife journal article supplement (doi:10.7554/elife.24630), 2017-05-12

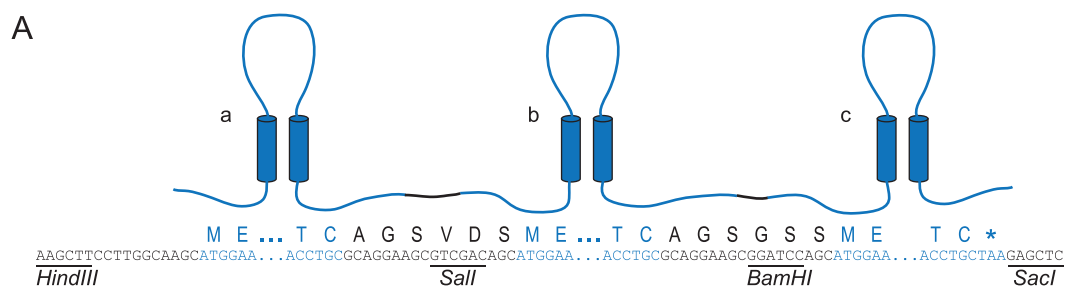

**B**

a 5' TGTGT AAGCTT CCTTGGCAAGCATGGAAGTGAAGACC  
 3' TGTGT GTCGAC GCTTCCTGCCGAGGTAAAGTCCTCAAACG

b 5' TGTGT GTCGAC AGCATGGAAGTGAAGACCGAGGAGG  
 3' TGT GGATCC GCTTCCTGCCGAGGTAAAGTCCTCAAACG

c 5' TGTGT GGATCC AGCATGGAAGTGAAGACCGAGGAGG  
 3' TGTGT GAGCTCTTAGCAGGTAAAGTCCTCAAACGTGC

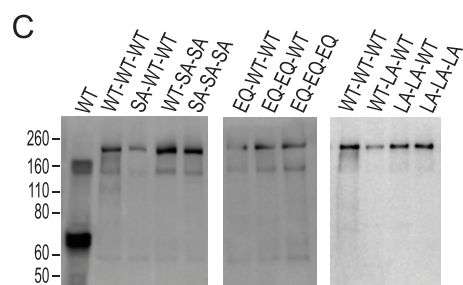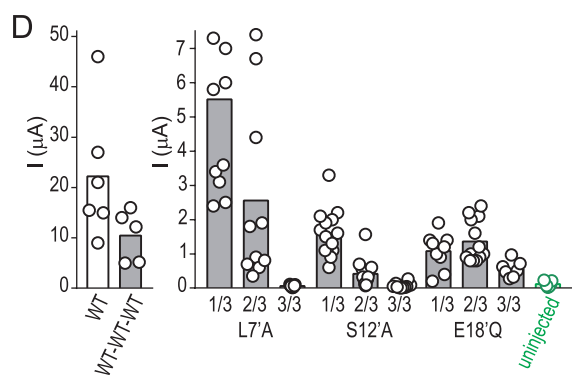

Supplement: supp [file elife_poa_e24630_Figure_4_Figure_Supplement_2.pdf › elife_poa_e24630_Figure_4_Figure_Supplement_2.pdf]
