# Supplementary figures and images for: A selectivity filter at the intracellular end of the acid-sensing ion channel pore
Source: eLife journal article supplement (doi:10.7554/elife.24630), 2017-05-12

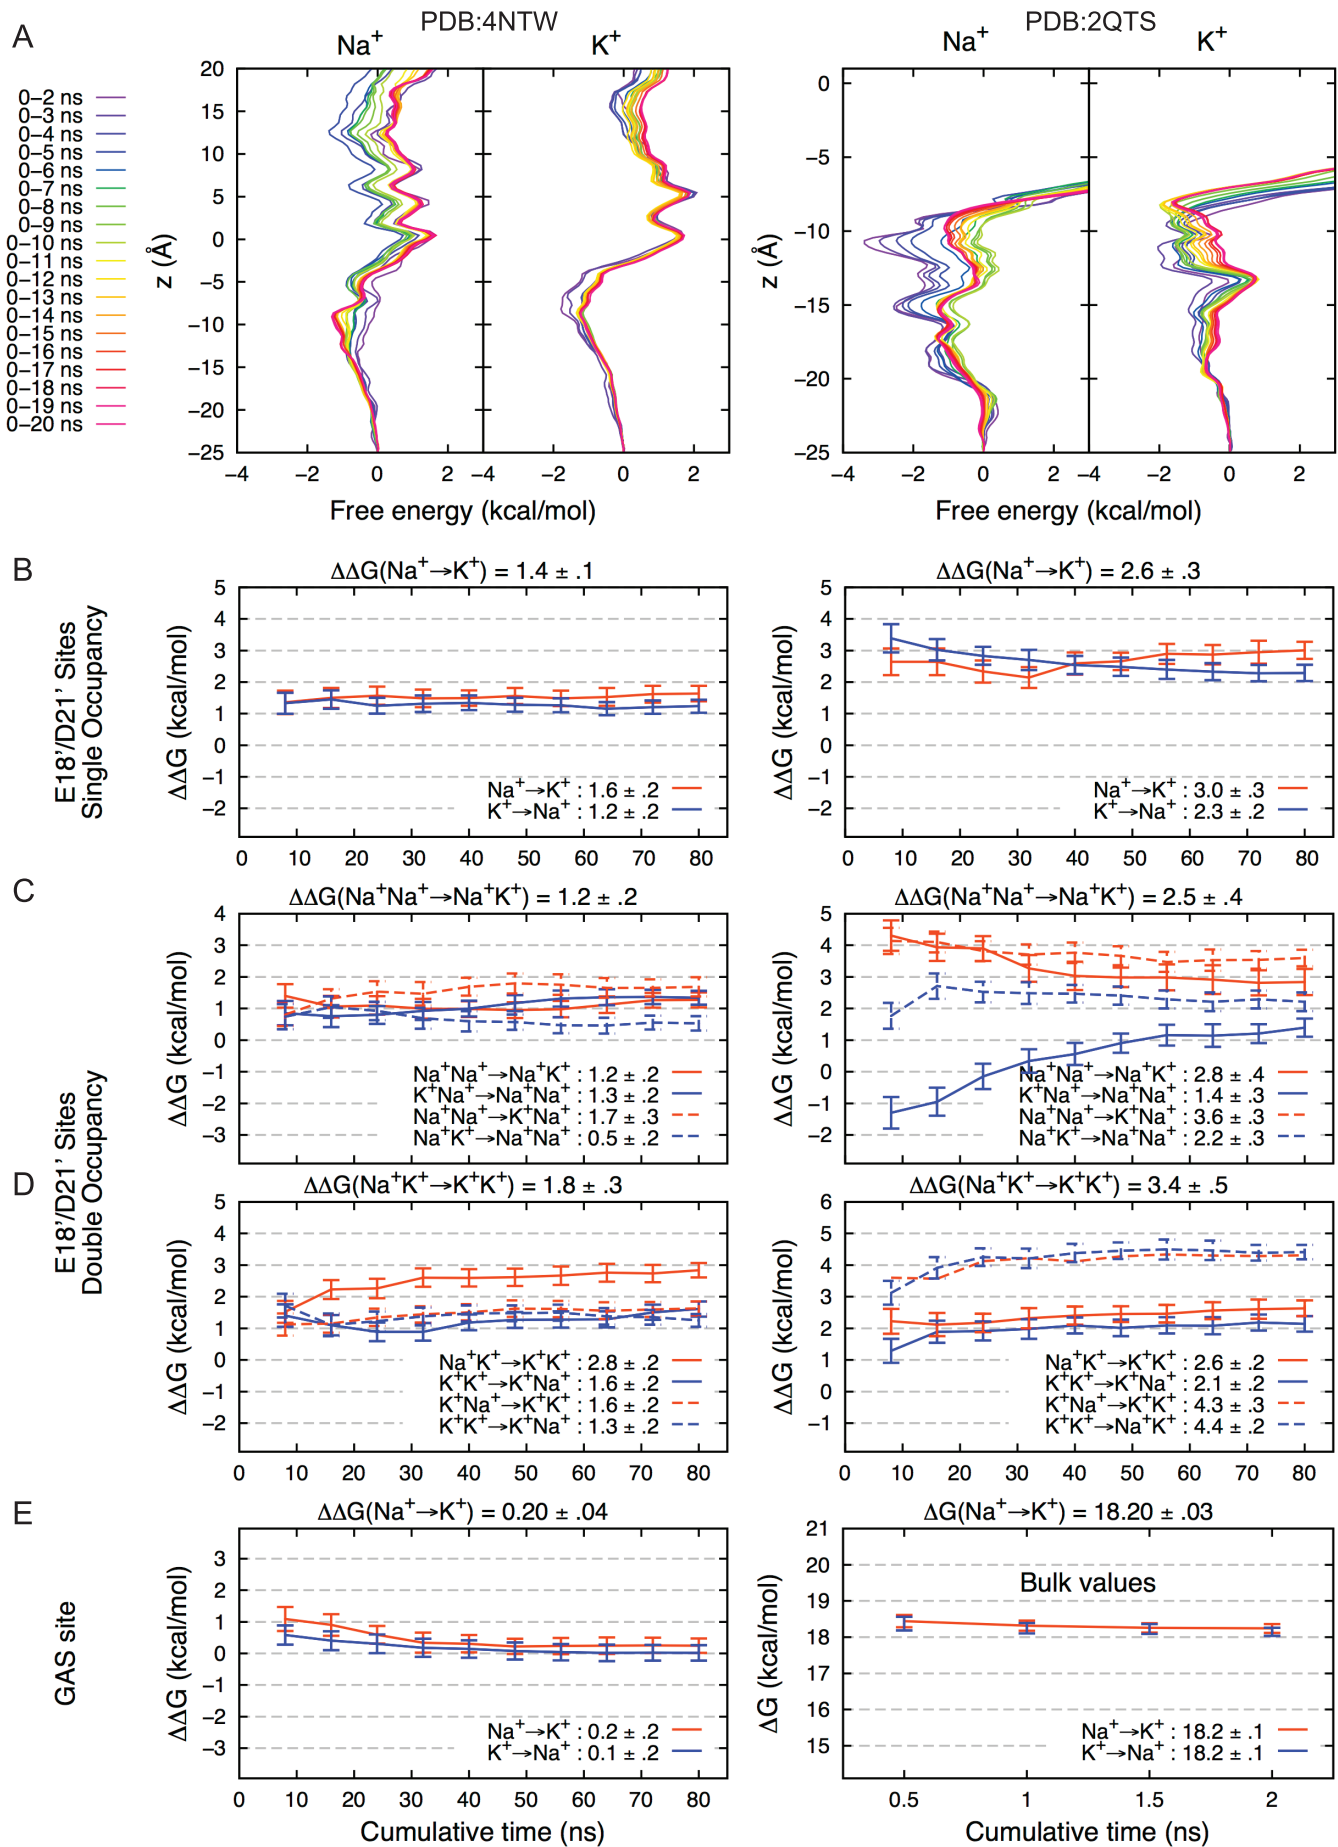

Supplement: supp [file elife_poa_e24630_Figure_2_Figure_Supplement_1.pdf › elife_poa_e24630_Figure_2_Figure_Supplement_1.pdf]

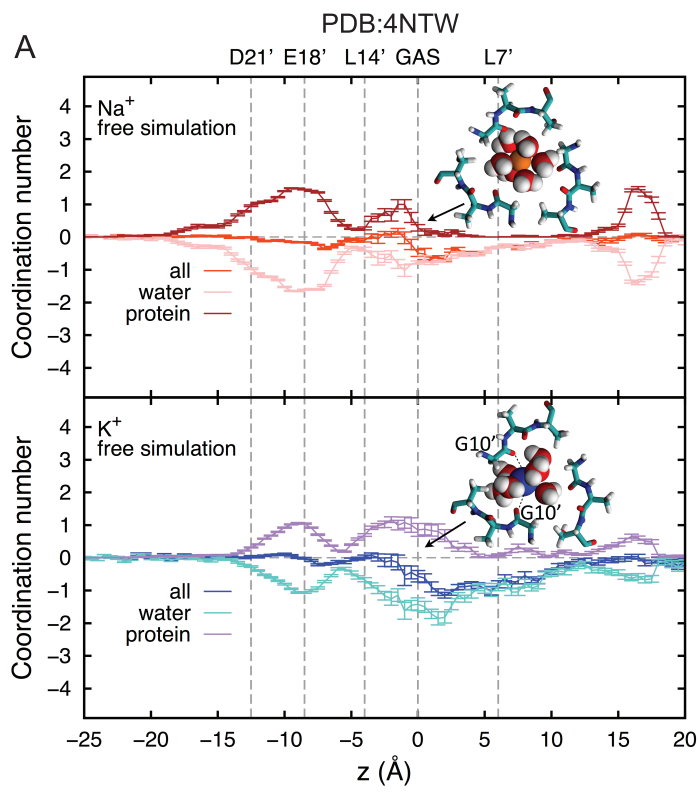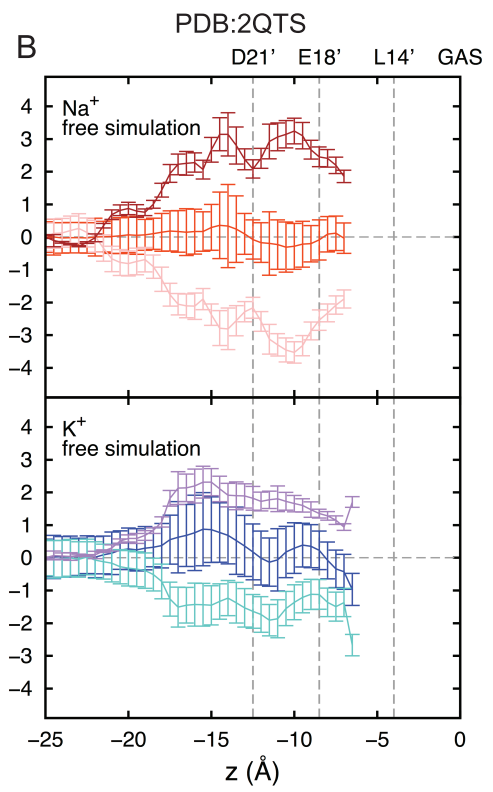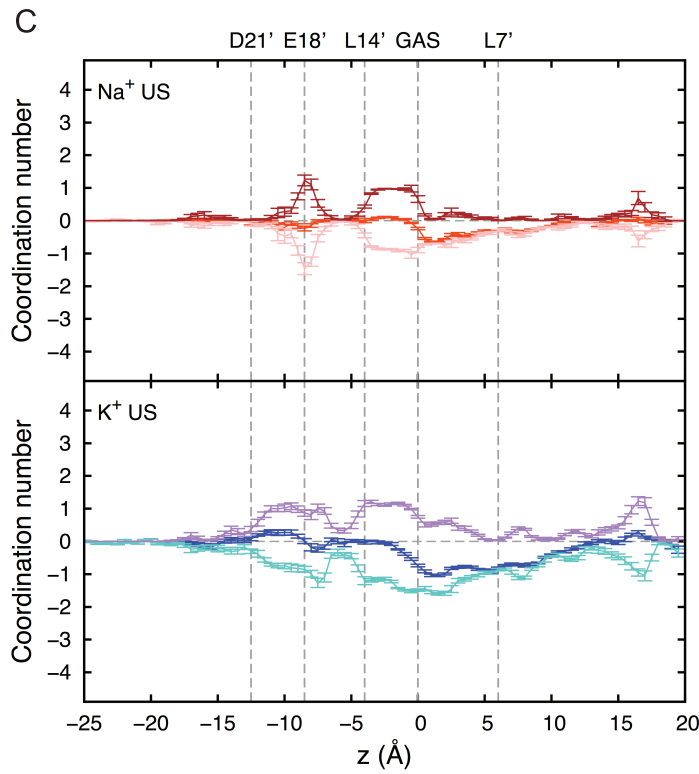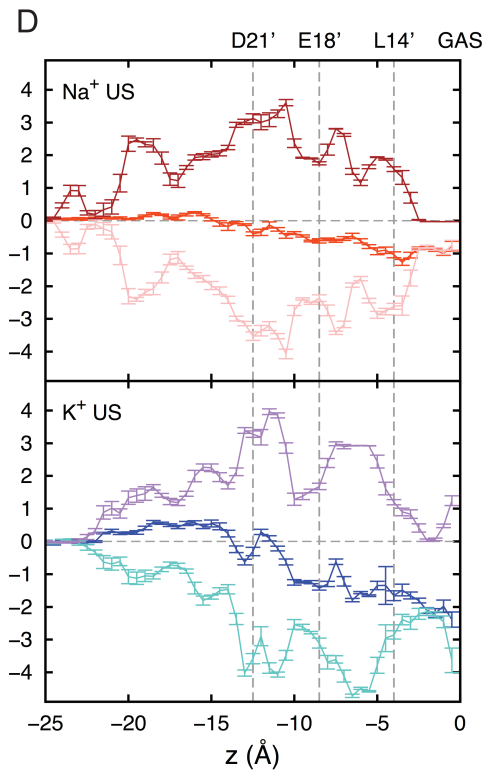

Supplement: supp [file elife_poa_e24630_Figure_2_Figure_Supplement_2.pdf › elife_poa_e24630_Figure_2_Figure_Supplement_2.pdf]

A

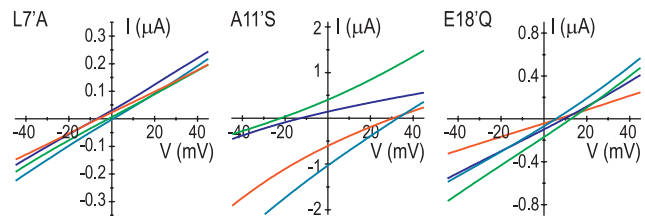

C

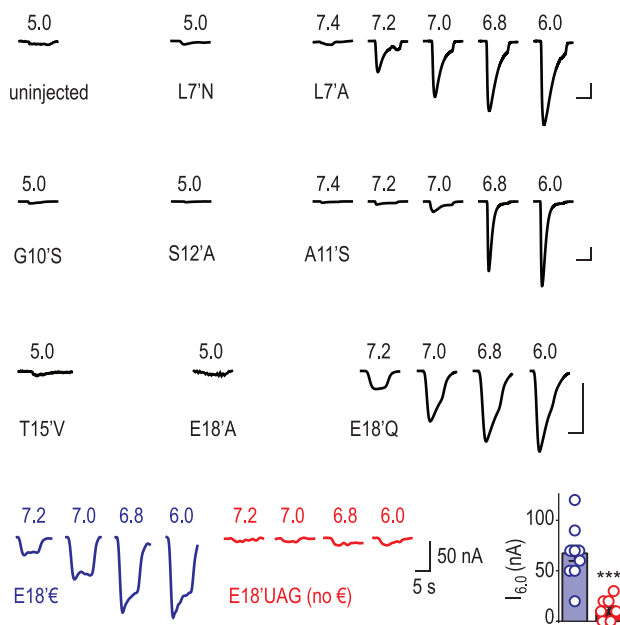

B

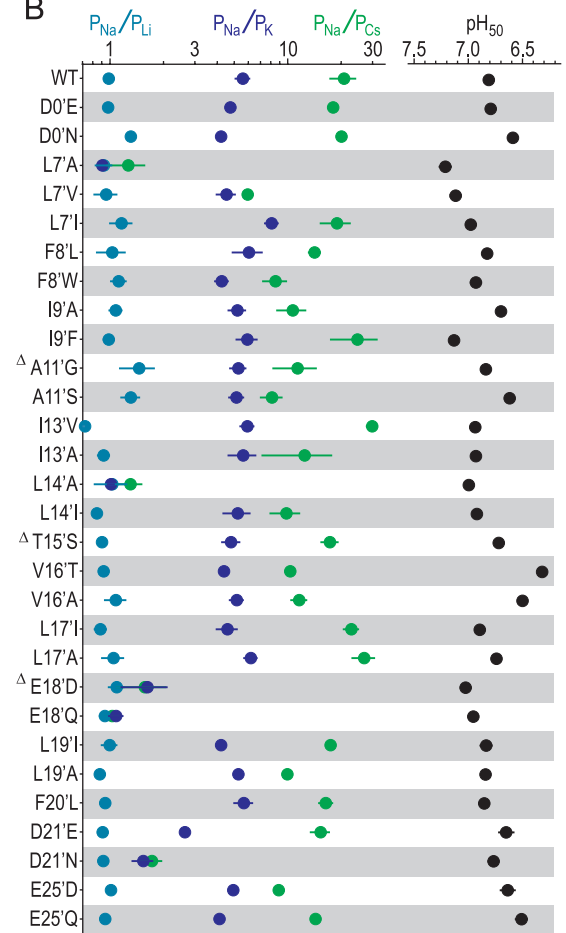

Supplement: supp [file elife_poa_e24630_Figure_4_Figure_Supplement_1.pdf › elife_poa_e24630_Figure_4_Figure_Supplement_1.pdf]
